# Supplementary material for: Proton chemical shift anisotropy measurements of hydrogen-bonded functional groups by fast magic-angle spinning solid-state NMR spectroscopy
Source: Royal Society of Chemistry journal article supplement (doi:10.1039/b801154k), 2008-01-01
Supplement: b801154k.pdf [file b801154k.pdf]

## Proton chemical shift anisotropy measurements of hydrogen-bonded functional groups by fast magic-angle spinning solid-state NMR spectroscopy

Luminita Duma, Daniel Abergel, Piotr Tekely\* and Geoffrey Bodenhausen

*Département de Chimie, associé au CNRS, Ecole Normale Supérieure, 24 rue Lhomond, 75231 Paris Cedex 05, France.*

### Supporting Information

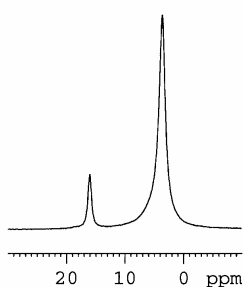

Fig. S1 400 MHz <sup>1</sup>H MAS NMR spectrum of octosilicate recorded at a spinning frequency of 10 kHz. The low field isotropic peak at 15.98 ppm represents siloxyl protons involved in strong hydrogen bonding, the high-field signal corresponds to water molecules.

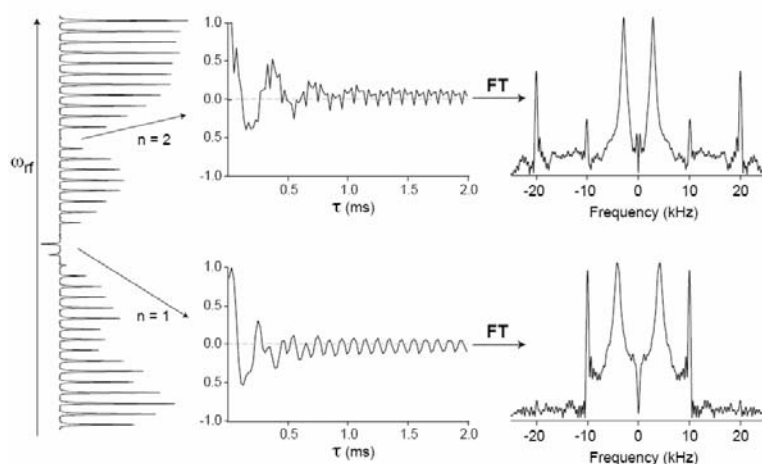

Fig. S2 (left) <sup>1</sup>H rotary resonance profile of siloxyl protons in octosilicate at 10 kHz MAS and 400 MHz resonance frequency. The spin-lock duration was set to 1 ms. The profile was obtained by varying the spin-lock RF field amplitude  $\omega_{rf}$  in steps of 0.5 dB from 11 to 30 dB attenuation. (middle) Temporal evolution of the signal as a function of spin-lock time  $\tau$  at  $n = 1$  and 2 rotary resonance conditions. (right) Fourier transformations giving rotary resonance fingerprints.
